# Supplementary material
Source: Springer Nature journal article supplement (https://www.springermedizin.de/resource/supplementary/12939_2013_461_MOESM5_ESM.pdf/9551224)

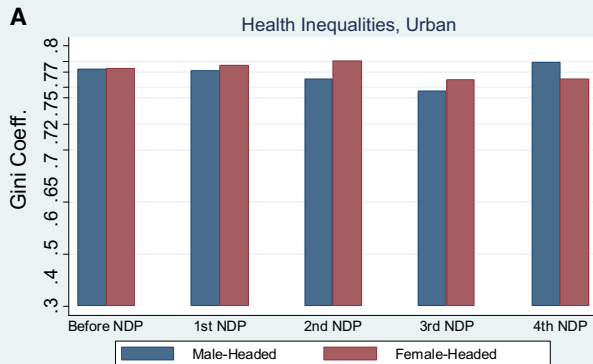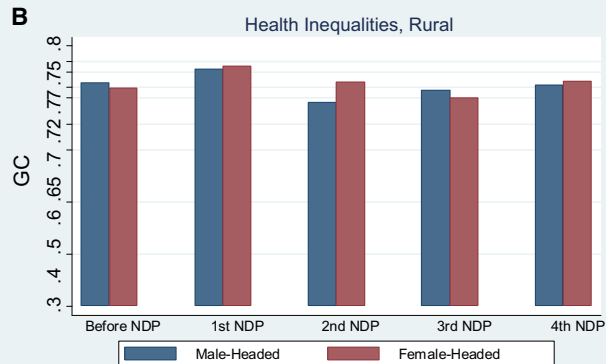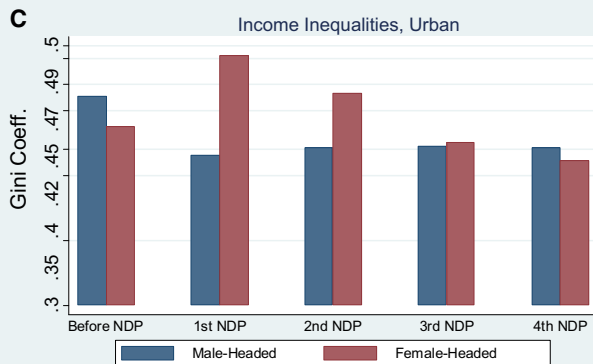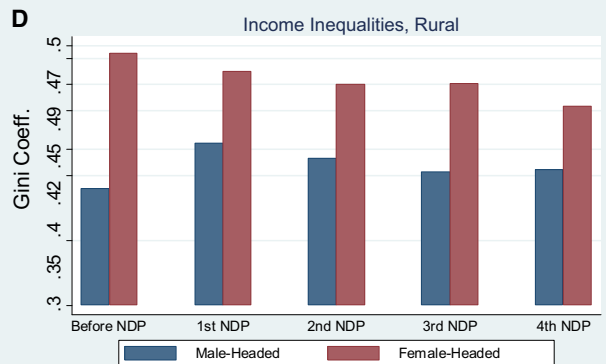

Supplement: MOESM5 [file 9551224]
